# Supplementary material for: Fabrication of an electroconductive, flexible, and soft poly(3,4-ethylenedioxythiophene)–thermoplastic polyurethane hybrid scaffold by in situ vapor phase polymerization
Source: Royal Society of Chemistry journal article supplement (doi:10.1039/c8tb00311d), 2018-01-01
Supplement: c8tb00311d1.pdf [file c8tb00311d1.pdf]

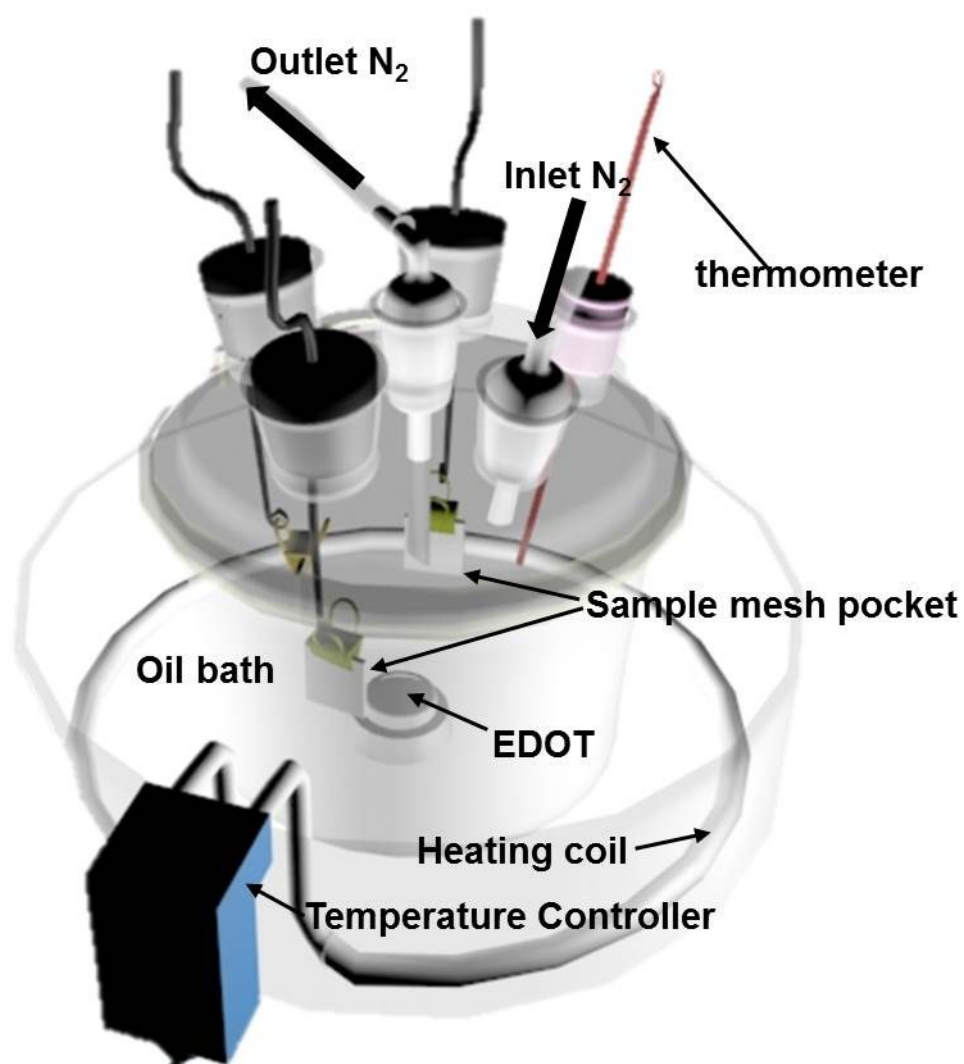

Figure S1. Schematic diagram of VPP chamber

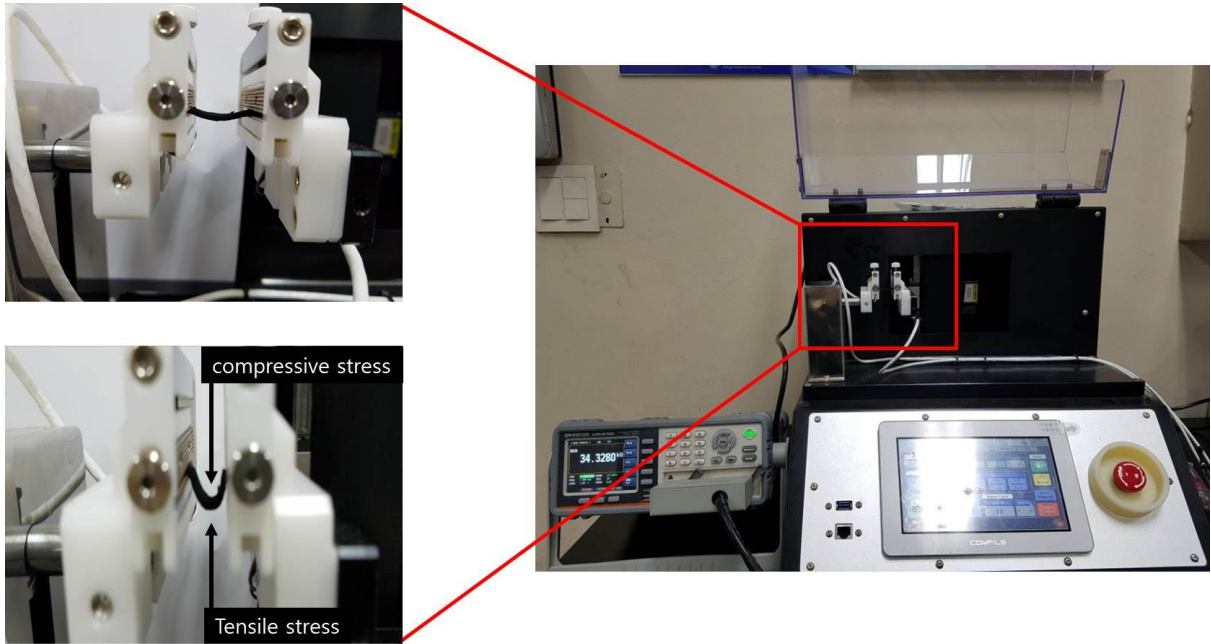

Figure S2. Images of the multi-purpose flexible test machine

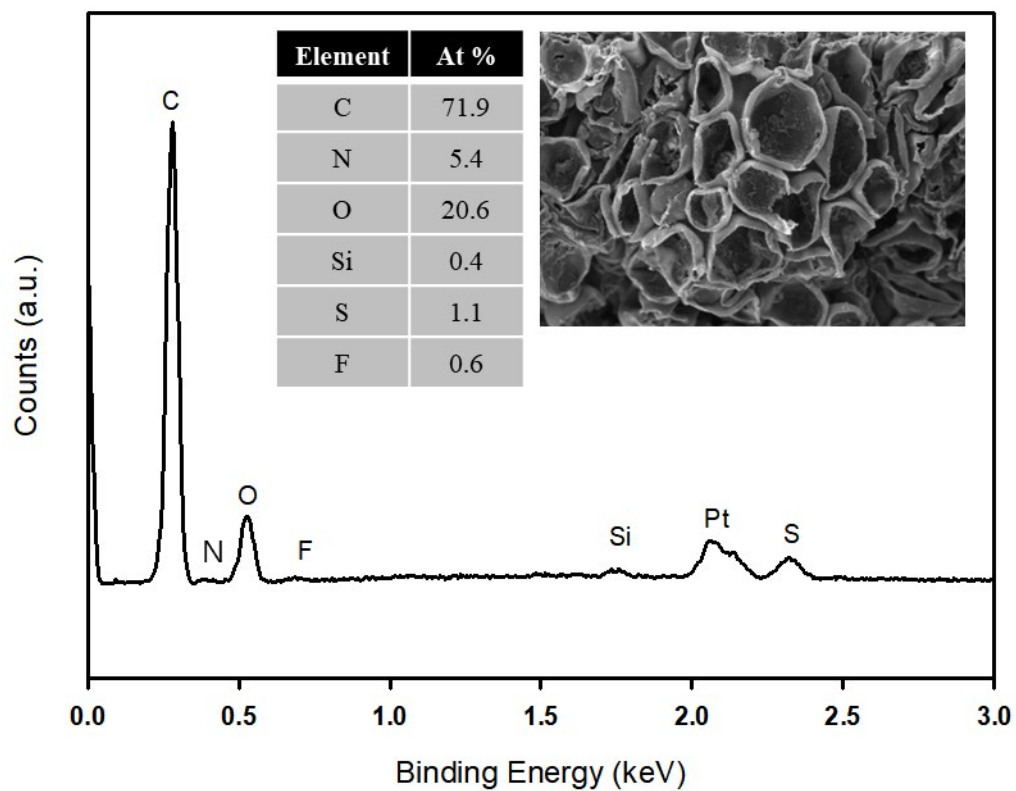

**Figure S3.** EDS element mapping data of TPU/PEDOT hybrid scaffold.
